# Supplementary material for: Ewing sarcoma resistance to SP-2509 is not mediated through KDM1A/LSD1 mutation
Source: PubMed Central journal article supplement (PMC6284858; doi:10.18632/oncotarget.26326), 2018-11-23
Supplement: oncotarget-09-36413-s001.pdf [file oncotarget-09-36413-s001.pdf]

## Ewing sarcoma resistance to SP-2509 is not mediated through KDM1A/LSD1 mutation

### SUPPLEMENTARY MATERIALS

#### Up-regulated by SP-2509 in parental A673 cells

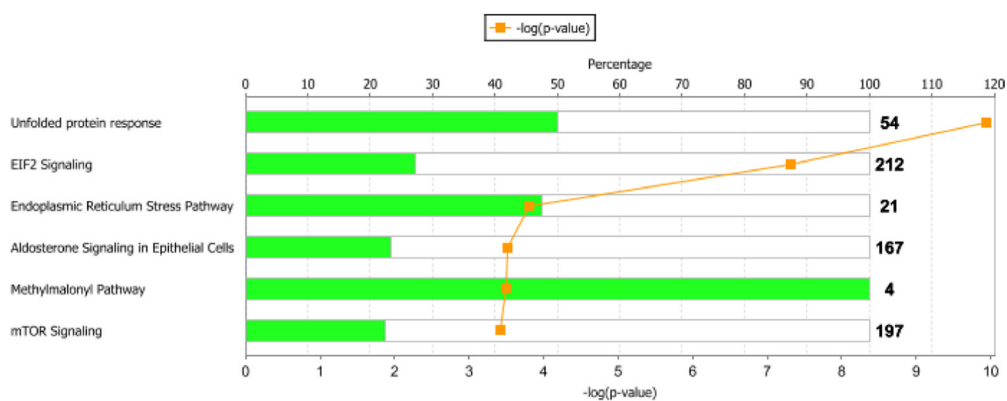

#### Up-regulated by SP-2509 in SP-2509 DR A673 cells

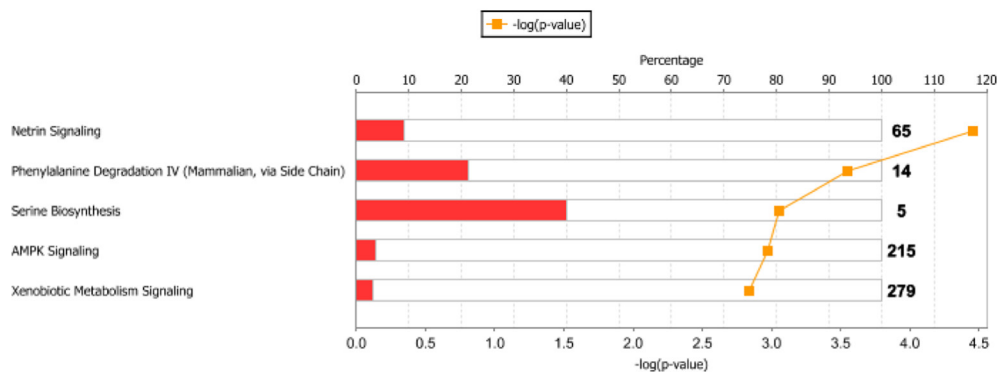

**Supplementary Figure 1: SP-2509 drug resistant cells do not engage the endoplasmic reticulum stress response following treatment with SP-2509.** RNA-Seq IPA of genes significantly upregulated (>1.5 fold) in parental and SP-2509 drug resistant (DR) cells following treatment with SP-2509 (2  $\mu$ M, 48 hrs). The percentage gene pathway overlap is shown. Bold numbers indicate the number of genes in that specific pathway.

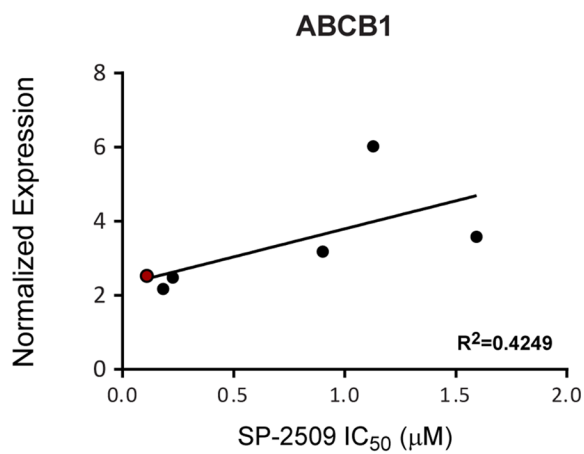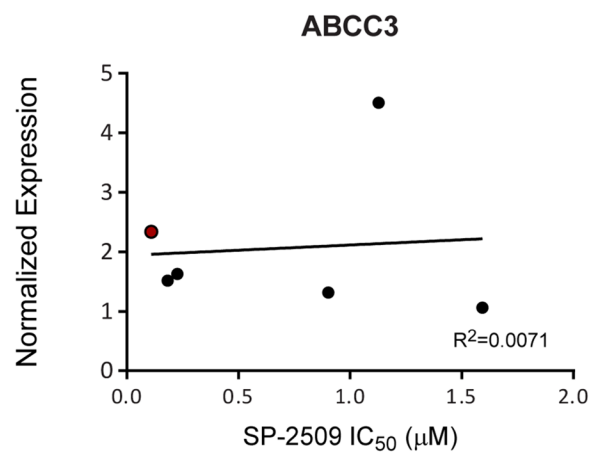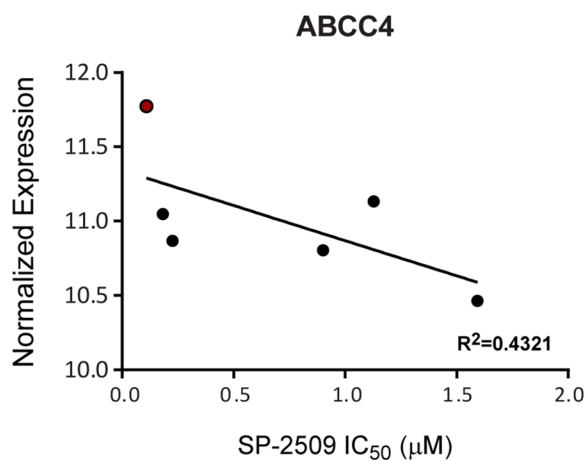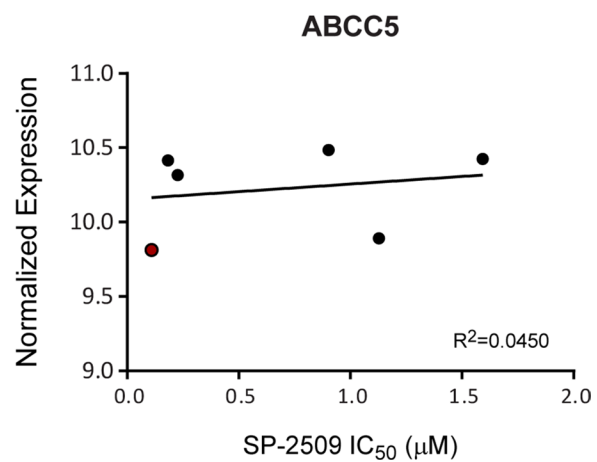

**Supplementary Figure 2: Expression of *ABCB1* and *ABCC4* correlate with sensitivity to SP-2509.** Correlation between sensitivity to SP-2509 and expression of multi-drug resistance genes. Ewing sarcoma cell line ( $n = 6$ ) SP-2509 sensitivity determined through CellTiter Glo analysis, 72 hrs post treatment. Data taken from Pishas *et al.*, 2018. Normalized expression of *ABCB1*, *ABCC3*, *ABCC4* and *ABCC5* taken from RNA-Seq analysis. ● Denotes A673 cells.

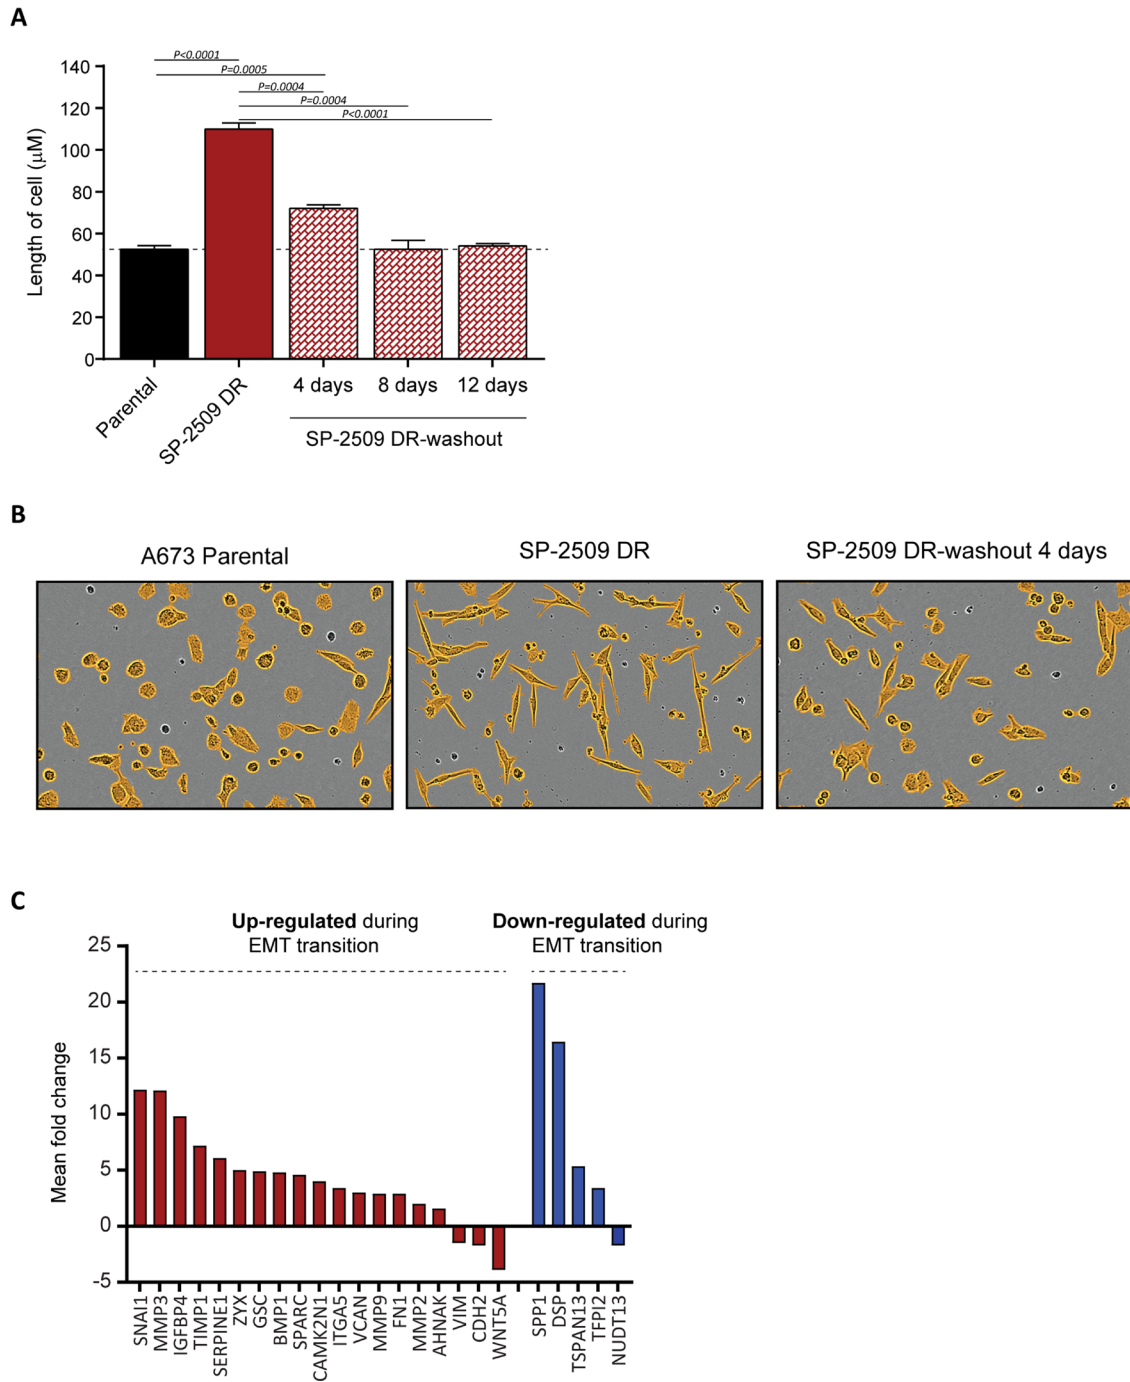

**Supplementary Figure 3: SP-2509 drug resistant cells display a reversible EMT morphology.** (A) Quantification of cell length in A673 parental, SP-2509 drug resistant (DR) and SP-2509 DR cells post washout for the indicated times. Data represents mean length  $\pm$  SEM from triplicate wells. 10 cells per well, 18 hrs post seeding were analyzed. (B) Representative phase contrast IncuCyte Zoom images of parental and SP-2509 DR cells 18 hrs post seeding. (C) RNA-Seq expression levels of EMT (epithelial to mesenchymal transition) genes significantly (>1.5 fold) altered in SP-2509 DR cells compared to parental. Data represents mean fold change from parental cells.

**A**

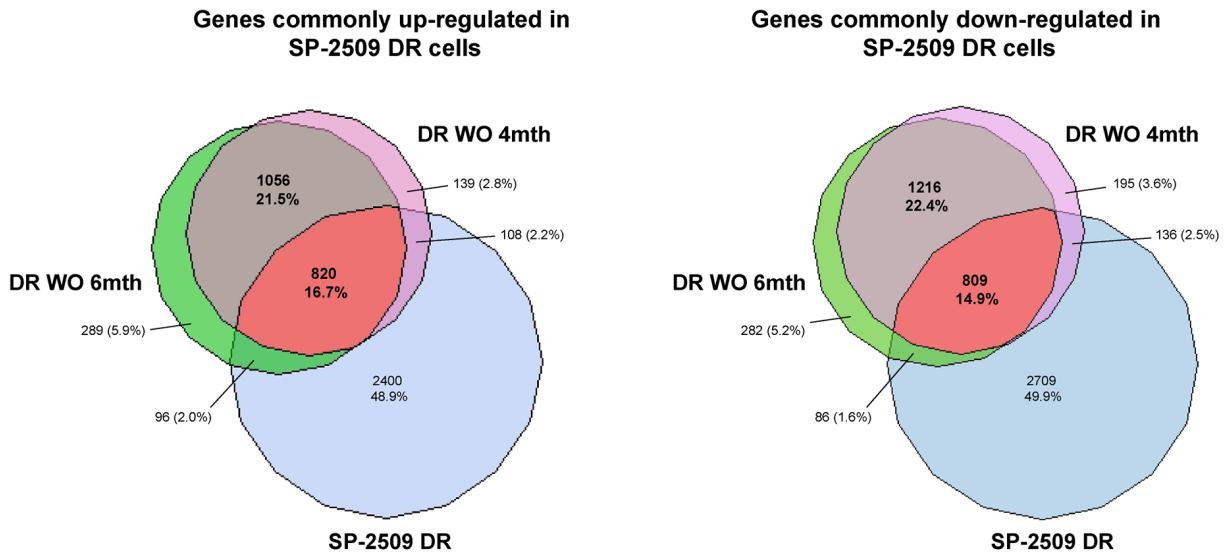

**B**

**Genes commonly up-regulated in SP-2509 DR cells**

| GO: Biological Process |            |                                               |                         |                        |                  |                     |
|------------------------|------------|-----------------------------------------------|-------------------------|------------------------|------------------|---------------------|
| Rank                   | ID         | Name                                          | p-Value                 | Bonferroni             | Genes from input | Genes in Annotation |
| 1                      | GO:0030196 | Extracellular matrix organization             | 1.296x10 <sup>-10</sup> | 8.090x10 <sup>-7</sup> | 40               | 354                 |
| 2                      | GO:0043062 | Extracellular structure organization          | 1.412x10 <sup>-10</sup> | 8.815x10 <sup>-7</sup> | 40               | 355                 |
| 3                      | GO:0048646 | Structure formation involved in morphogenesis | 4.082x10 <sup>-10</sup> | 2.548x10 <sup>-6</sup> | 91               | 1299                |
| 4                      | GO:0001525 | Angiogenesis                                  | 4.328x10 <sup>-10</sup> | 2.702x10 <sup>-6</sup> | 46               | 464                 |

| GO: Molecular Function |            |                              |                        |                        |                  |                     |
|------------------------|------------|------------------------------|------------------------|------------------------|------------------|---------------------|
| Rank                   | ID         | Name                         | p-Value                | Bonferroni             | Genes from input | Genes in Annotation |
| 1                      | GO:0050840 | Extracellular matrix binding | 4.957x10 <sup>-7</sup> | 7.524x10 <sup>-4</sup> | 12               | 56                  |
| 2                      | GO:0019838 | Growth factor binding        | 3.021x10 <sup>-6</sup> | 4.587x10 <sup>-3</sup> | 18               | 142                 |
| 3                      | GO:0005518 | Collagen binding             | 8.107x10 <sup>-6</sup> | 1.231x10 <sup>-2</sup> | 12               | 72                  |
| 4                      | GO:0005102 | Signaling receptor binding   | 1.498x10 <sup>-5</sup> | 2.275x10 <sup>-2</sup> | 89               | 1601                |

**Genes commonly down-regulated in SP-2509 DR cells**

| GO: Biological Process |            |                                                       |                        |                        |                  |                     |
|------------------------|------------|-------------------------------------------------------|------------------------|------------------------|------------------|---------------------|
| Rank                   | ID         | Name                                                  | p-Value                | Bonferroni             | Genes from input | Genes in Annotation |
| 1                      | GO:0048667 | Cell morphogenesis involved in neuron differentiation | 5.396x10 <sup>-8</sup> | 3.148x10 <sup>-4</sup> | 50               | 590                 |
| 2                      | GO:0007409 | Axonogenesis                                          | 5.426x10 <sup>-7</sup> | 3.165x10 <sup>-3</sup> | 41               | 475                 |
| 3                      | GO:0048812 | Neuron projection morphogenesis                       | 9.523x10 <sup>-7</sup> | 5.556x10 <sup>-3</sup> | 49               | 630                 |
| 4                      | GO:0000904 | Cell morphogenesis involved in differentiation        | 9.977x10 <sup>-7</sup> | 5.820x10 <sup>-3</sup> | 60               | 840                 |

| GO: Molecular Function |            |                                                                                                  |                        |                        |                  |                     |
|------------------------|------------|--------------------------------------------------------------------------------------------------|------------------------|------------------------|------------------|---------------------|
| Rank                   | ID         | Name                                                                                             | p-Value                | Bonferroni             | Genes from input | Genes in Annotation |
| 1                      | GO:0000982 | Transcription factor activity, RNA polymerase II proximal promoter sequence-specific DNA binding | 6.278x10 <sup>-6</sup> | 8.946x10 <sup>-3</sup> | 32               | 365                 |
| 2                      | GO:0044212 | Transcription regulatory region DNA binding                                                      | 7.673x10 <sup>-6</sup> | 1.093x10 <sup>-2</sup> | 58               | 860                 |
| 3                      | GO:0000976 | Transcription regulatory region sequence-specific DNA binding                                    | 8.387x10 <sup>-6</sup> | 1.195x10 <sup>-2</sup> | 50               | 704                 |
| 4                      | GO:0001067 | Regulatory region nucleic acid binding                                                           | 9.441x10 <sup>-6</sup> | 1.345x10 <sup>-2</sup> | 58               | 866                 |

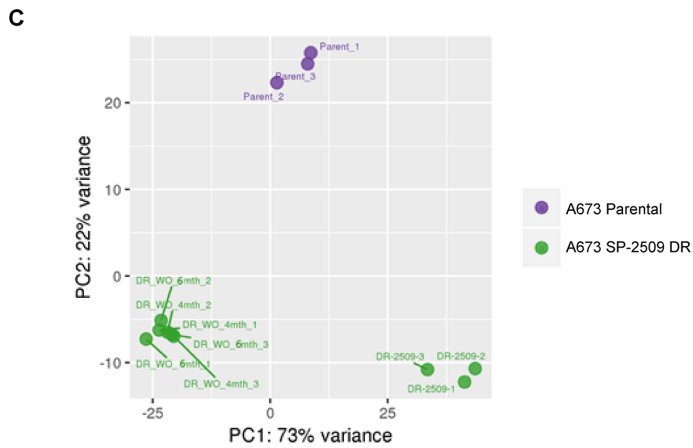

**D**

| NuRD/REST component | Fold change in expression from parental A673 |                    |                    |
|---------------------|----------------------------------------------|--------------------|--------------------|
|                     | SP-2509 DR                                   | SP-2509 DR-WO 4mth | SP-2509 DR-WO 6mth |
| BHC80/PHF21A        | -5.2                                         | -2.2               | -2.1               |
| CHD3                | -1.6                                         |                    |                    |
| CHD4                | -1.9                                         |                    |                    |
| GATAD2A             | -5.9                                         |                    |                    |
| GATAD2B             |                                              |                    |                    |
| HDAC1               |                                              |                    |                    |
| HDAC2               | -5.3                                         |                    |                    |
| MBD2                |                                              |                    |                    |
| MBD3                |                                              |                    |                    |
| MTA1                | -5.0                                         |                    |                    |
| MTA2                | -1.6                                         |                    |                    |
| MTA3                |                                              |                    |                    |
| RBBP4               | -2.1                                         |                    |                    |
| RBBP7               |                                              |                    |                    |
| RCOR1/CoREST1       | -3.5                                         | -2.3               | -2                 |
| RCOR2/CoREST1       | -4.1                                         | 2.1                | 2.5                |
| SIN3A               | -4.6                                         |                    |                    |
| SIN3B               | -3.2                                         |                    |                    |

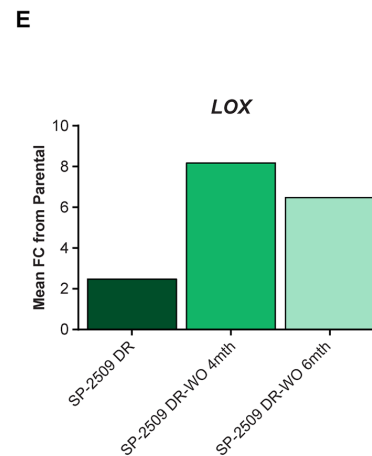

**Supplementary Figure 4: Core SP-2509 drug resistant transcriptional profile.** (A) Venn diagram analysis of RNA-Seq genes universally up/down-regulated ( $\geq 1.5$  fold change) in SP-2509 drug resistant (DR) and SP-2509 DR-washout (WO) cells (4 and 6 months) compared to parental A673 cells. (B) ToppGene Suite analysis of GO biological and molecular function pathways associated with core SP-2509 DR genes ( $n = 820$  up-regulated and  $n = 809$  down-regulated). (C) PCA analysis of all SP-2509 DR groups. (D) Expression levels of NuRD/REST components in SP-2509 DR cells. Data expressed as normalized fold change (FC) from parental A673 cells. (E) Expression levels of *LOX* in SP-2509 DR cells. Data expressed as normalized FC from parental A673 cells.

**Supplementary Table 1: Mutations acquired during prolong passage of A673 cells.** See Supplementary\_Table\_1

**Supplementary Table 2: Mutations identified in SP-2509 DR washout cells.** See Supplementary\_Table\_2
