# Supplementary material for: Ewing sarcoma resistance to SP-2509 is not mediated through KDM1A/LSD1 mutation
Source: PubMed Central journal article supplement (PMC6284858; doi:10.18632/oncotarget.26326), 2018-11-23
Supplement: oncotarget-09-36413-s002.pdf [file oncotarget-09-36413-s002.pdf]

**Supplementary Table 1: Mutations acquired during prolong passage of A673 cells**

| Rank | Position | Type | Gene    |                                                                  | Loc In Gene   | Effect   | HGVS         | Population % |
|------|----------|------|---------|------------------------------------------------------------------|---------------|----------|--------------|--------------|
| 1    | 17q21.2  | SNP  | KAT2A   | Lysine Acetyltransferase 2A                                      | CS            | Stopgain | p.Tyr807*    | 40.3%        |
| 2 #  | 11q23.3  | SNP  | C2CD2L  | C2CD2 Like                                                       | CS            | NS-SNV   | p.Glu178Asp  | 30.5%        |
| 3    | 5q33.3   | SNP  | CYFIP2  | Cytoplasmic FMR1 Interacting Protein 2                           | CS            | NS-SNV   | p.Ala437Gly  | 29.3%        |
| 4    | 5q23.1   | SNP  | SEMA6A  | Semaphorin 6A                                                    | CS            | NS-SNV   | p.Lys640Arg  | 27.3%        |
| 5    | 22q13.2  | SNP  | TTL12   | Tubulin Tyrosine Ligase Like 12                                  | splice_site   |          | c.178-1G>T   | 25.8%        |
| 6    | 17p11.2  | SNP  | RNF112  | Ring Finger Protein 112                                          | CS            | NS-SNV   | p.Asn156Ile  | 24.8%        |
| 7    | 1p36.33  | SNP  | VWA1    | Von Willebrand Factor A Domain Containing 1                      | CS            | NS-SNV   | p.Cys420Tyr  | 23.1%        |
| 8    | 4q25     | SNP  | LRIT3   | Leucine Rich Repeat, Ig-Like And Transmembrane Domains 3         | CS            | NS-SNV   | p.Ala514Glu  | 23.1%        |
| 9    | 8q13.3   | SNP  | TRPA1   | Transient Receptor Potential Cation Channel Subfamily A Member 1 | CS            | NS-SNV   | p.Leu697Pro  | 22.6%        |
| 10   | 7q32.1   | SNP  | FSCN3   | Fascin Actin-Bundling Protein 3                                  | splice_site   |          | c.145-1G>T   | 22.1%        |
| 11   | 1q21.3   | SNP  | TDRD10  | Tudor Domain Containing 10                                       | CS            | NS-SNV   | p.Glu166Asp  | 21.6%        |
| 12   | 6q16.1   | SNP  | MMS22L  | MMS22 Like, DNA Repair Protein                                   | CS            | NS-SNV   | p.Arg1212Ser | 21.1%        |
| 13   | 20q11.23 | SNP  | RALGAPB | Ral GTPase Activating Protein Non-Catalytic Beta Subunit         | CS            | NS-SNV   | p.Lys933Glu  | 21.0%        |
| 14   | 10q24.1  | SNP  | SLIT1   | Slit Guidance Ligand 1                                           | CS            | NS-SNV   | p.Ala1234Pro | 21.0%        |
| 15   | 7q31.1   | SNP  | LAMB4   | Laminin Subunit Beta 4                                           | CS            | NS-SNV   | p.Leu931Met  | 20.3%        |
| 16   | 22q13.2  | SNP  | CHADL   | Chondroadherin Like                                              | CS            | NS-SNV   | p.Leu472Arg  | 20.1%        |
| 17   | 6q16.3   | SNP  | ASCC3   | Activating Signal Cointegrator 1 Complex Subunit 3               | CS            | Stopgain | p.Glu156*    | 19.9%        |
| 18   | Xp22.2   | SNP  | GPR143  | G Protein-Coupled Receptor 143                                   | CS            | NS-SNV   | p.Arg237Gly  | 19.8%        |
| 19   | 17p13.2  | SNP  | SLC52A1 | Solute Carrier Family 52 Member 1                                | CS            | NS-SNV   | p.Ala122Glu  | 19.4%        |
| 20   | 1p34.3   | SNP  | ZMYM1   | Zinc Finger MYM-Type Containing 1                                | CS            | NS-SNV   | p.Lys734Asn  | 19.4%        |
| 21   | 10q26.13 | SNP  | DMBT1   | Deleted In Malignant Brain Tumors 1                              | CS            | NS-SNV   | p.Val486Leu  | 19.3%        |
| 22   | 14q23.2  | SNP  | ESR2    | Estrogen Receptor 2                                              | CS            | NS-SNV   | p.Val269Ala  | 19.2%        |
| 23   | 3p25.1   | SNP  | NUP210  | Nucleoporin 210                                                  | CS            | NS-SNV   | p.Gly1269Val | 18.8%        |
| 24   | 12p13.2  | SNP  | CLEC12A | C-Type Lectin Domain Family 12 Member A                          | splice_region | Stopgain | p.Glu127*    | 18.8%        |
| 25   | 5p15.2   | SNP  | CTNND2  | Catenin Delta 2                                                  | CS            | Stopgain | p.Ser39*     | 18.3%        |
| 26   | 1q31.3   | SNP  | ASPM    | Abnormal Spindle Microtubule Assembly                            | CS            | NS-SNV   | p.Lys1603Glu | 18.2%        |
| 27   | 9q31.2   | SNP  | KLF4    | Kruppel Like Factor 4                                            | EISR          |          | c.1264+8G>T  | 18.2%        |
| 28   | 11p15.4  | SNP  | TRIM66  | Tripartite Motif Containing 66                                   | CS            | NS-SNV   | p.Glu1107Gln | 18.1%        |
| 29   | 13q22.1  | SNP  | KLF12   | Kruppel Like Factor 12                                           | CS            | NS-SNV   | p.Arg396Cys  | 18.0%        |

Supplementary Table S1 Continued

|    |          |     |          |                                                           |      |            |                        |       |
|----|----------|-----|----------|-----------------------------------------------------------|------|------------|------------------------|-------|
| 30 | 15q26.3  | SNP | ADAMTS17 | ADAM Metallopeptidase With Thrombospondin Type 1 Motif 17 | CS   | NS-SNV     | p.Pro639Thr            | 17.9% |
| 31 | 19p12    | SNP | ZNF493   | Zinc Finger Protein 493                                   | CS   | NS-SNV     | p.Ser23Arg             | 17.7% |
| 32 | 7q21.13  | DEL | CDK14    | Cyclin Dependent Kinase 14                                | CS   | Frameshift | p.Asp319fs             | 17.6% |
| 33 | 2p16.3   | SNP | NRXN1    | Neurexin 1                                                | CS   | NS-SNV     | p.Glu389Asp            | 17.4% |
| 34 | 19p13.3  | SNP | ONECUT3  | One Cut Homeobox 3                                        | CS   | NS-SNV     | p.Ala150Pro            | 17.2% |
| 35 | 19p13.3  | SNP | ZNF556   | Zinc Finger Protein 556                                   | CS   | NS-SNV     | p.Glu63Asp             | 17.1% |
| 36 | 17p13.1  | SNP | PFAS     | Phosphoribosylformylglycinamide Synthase                  | CS   | NS-SNV     | p.Arg1310Leu           | 17.1% |
| 37 | 2q12.1   | SNP | SLC9A2   | Solute Carrier Family 9 Member A2                         | EISR |            | c.1515+4G>T            | 15.9% |
| 38 | 19q13.12 | SNP | ZFP14    | ZFP14 Zinc Finger Protein                                 | CS   | NS-SNV     | p.His190Tyr            | 15.9% |
| 39 | Xp11.22  | SNP | FGD1     | FYVE, RhoGEF And PH Domain Containing 1                   | CS   | NS-SNV     | p.Glu590Asp            | 15.8% |
| 40 | 7q21.2   | SNP | SAMD9L   | Sterile Alpha Motif Domain Containing 9 Like              | CS   | NS-SNV     | p.Ile614Thr            | 15.6% |
| 41 | 19q13.2  | SNP | CATSPERG | Cation Channel Sperm Associated Auxiliary Subunit Gamma   | CS   | NS-SNV     | p.Ser1036Arg           | 15.1% |
| 42 | 15q15.1  | SNP | PLCB2    | Phospholipase C Beta 2                                    | CS   | NS-SNV     | p.Glu275Asp            | 14.7% |
| 43 | 7q31.1   | SNP | LAMB1    | Laminin Subunit Beta 1                                    | CS   | Stopgain   | p.Cys1165*             | 14.7% |
| 44 | 6q13     | SNP | RIMS1    | Regulating Synaptic Membrane Exocytosis 1                 | CS   | NS-SNV     | p.Glu1409Lys           | 13.5% |
| 45 | 8q24.13  | SNP | ANXA13   | Annexin A13                                               | CS   | NS-SNV     | p.Gln12Arg             | 13.4% |
| 46 | 17q25.1  | SNP | SDK2     | Sidekick Cell Adhesion Molecule 2                         | CS   | NS-SNV     | p.Pro1750Leu           | 10.9% |
| 47 | 7q22.1   | SNP | MUC12    | Mucin 12, Cell Surface Associated                         | CS   | NS-SNV     | p.Thr3456Met           | 9.0%  |
| 48 | 3p21.31  | SNP | XCR1     | X-C Motif Chemokine Receptor 1                            | CS   | NS-SNV     | p.Val301Ala            | 7.1%  |
| 49 | 12q24.22 | SNP | NOS1     | Nitric Oxide Synthase 1                                   | CS   | NS-SNV     | p.Gly219Glu            | 6.5%  |
| 50 | 11q12.1  | DEL | ZDHC5    | Zinc Finger DHHC-Type Containing 5                        | EISR |            | c.753-13_753-10delTCTC | 6.3%  |
| 51 | 10q24.33 | SNP | PCGF6    | Polycomb Group Ring Finger 6                              | CS   | NS-SNV     | p.Glu42Ala             | 5.3%  |

CS: Coding sequence, EISR: Extended intronic splice region, NS-SNV: Non-synonymous single nucleotide variant, SNP: Single Nucleotide Polymorphism

# C2CD2L mutation also observed in SP-2509 drug resistant cells
