# Supplementary material for: Ewing sarcoma resistance to SP-2509 is not mediated through KDM1A/LSD1 mutation
Source: PubMed Central journal article supplement (PMC6284858; doi:10.18632/oncotarget.26326), 2018-11-23
Supplement: oncotarget-09-36413-s003.pdf [file oncotarget-09-36413-s003.pdf]

**Supplementary Table 2: Mutations identified in SP-2509 DR washout cells**

| Rank | Type | Position | Gene                                                   | Loc In Gene | Effect     | HGVS               | Population | Present in DR cells |
|------|------|----------|--------------------------------------------------------|-------------|------------|--------------------|------------|---------------------|
| 1    | SNP  | 9p21.2   | EQTN Equatorin                                         | EISR        |            |                    | 43.3%      | No                  |
| 2    | SNP  | 2p21     | EML4 Echinoderm Microtubule Associated Protein Like 4  | CS          | NS-SNV     | p.Gln872Arg        | 32.9%      | No                  |
| 3    | SNP  | 2p21     | EML4 Echinoderm Microtubule Associated Protein Like 4  | CS          | NS-SNV     | p.Asn873Asp        | 32.6%      | No                  |
| 4    | SNP  | 14q21.3  | POLE2 DNA Polymerase Epsilon 2, Accessory Subunit      | CS          | NS-SNV     | p.Arg9Gln          | 31.0%      | No                  |
| 5    | SNP  | 6q24.3   | ADGB Androglobin                                       | CS          | NS-SNV     | p.Leu1363Trp       | 31.0%      | No                  |
| 6    | SNP  | 13q12.13 | RNF6 Ring Finger Protein 6                             | CS          | NS-SNV     | p.Ser209Gly        | 30.1%      | No                  |
| 7    | SNP  | 8q11.23  | RB1CC1 RB1 Inducible Coiled-Coil 1                     | CS          | NS-SNV     | p.Ala445Glu        | 29.4%      | No                  |
| 8    | SNP  | 9q34.12  | ABL1 ABL Proto-Oncogene 1, Non-Receptor Tyrosine       | CS          | NS-SNV     | p.Gly864Val        | 29.1%      | No                  |
| 9    | SNP  | 6q27     | C6orf118 Chromosome 6 Open Reading Frame 118           | CS          | NS-SNV     | p.Leu182Met        | 28.4%      | No                  |
| 10   | SNP  | 13q12.13 | WASF3 WAS Protein Family Member 3                      | CS          | NS-SNV     | p.Glu462Asp        | 27.4%      | No                  |
| 11   | SNP  | 19q13.41 | NKG7 Natural Killer Cell Granule Protein 7             | CS          | NS-SNV     | p.Gln124His        | 27.3%      | No                  |
| 12   | SNP  | 5q22.3   | CCDC112 Coiled-Coil Domain Containing 112              | CS          | Stopgain   | p.Lys87*           | 26.2%      | No                  |
| 13   | SNP  | Xq22.3   | NRK Nik Related Kinase                                 | CS          | NS-SNV     | p.Ser927Arg        | 26.1%      | No                  |
| 14   | SNP  | 3p22.3   | CRTAP Cartilage Associated Protein                     | CS          | NS-SNV     | p.Arg6Gln          | 25.8%      | No                  |
| 15   | DEL  | 8p21.2   | TRIM35 Tripartite Motif Containing 35                  | EISR        |            |                    | 25.2%      | No                  |
| 16   | SNP  | 3p25.1   | FGD5 FYVE, RhoGEF And PH Domain Containing 5           | splice_site |            |                    | 24.2%      | No                  |
| 17   | SNP  | 16q22.1  | LRRC29 Leucine Rich Repeat Containing 29               | CS          | NS-SNV     | p.Gln146Lys        | 24.1%      | No                  |
| 18   | SNP  | Xq25     | LOC100129520                                           | CS          | NS-SNV     | p.Trp91Leu         | 23.8%      | No                  |
| 19   | SNP  | 1p13.1   | PTGFRN Prostaglandin F2 Receptor Inhibitor             | CS          | NS-SNV     | p.His341Gln        | 23.8%      | No                  |
| 20   | SNP  | 11p15.1  | OTOG Otogelin                                          | CS          | NS-SNV     | p.Gly859Arg        | 23.8%      | No                  |
| 21   | SNP  | 1q25.3   | CACNA1E Calcium Voltage-Gated Channel Subunit Alpha1 E | CS          | NS-SNV     | p.Phe651Leu        | 23.4%      | No                  |
| 22   | SNP  | 7q22.1   | CYP3A4 Cytochrome P450 Family 3 Subfamily A Member 4   | CS          | NS-SNV     | p.Leu132Phe        | 22.7%      | No                  |
| 23   | SNP  | 1q32.1   | NFASC Neurofascin                                      | CS          | NS-SNV     | p.Gly232Arg        | 22.3%      | No                  |
| 24   | DEL  | 14q32.33 | AHNAK2 AHNAK Nucleoprotein 2                           | CS          | Non-       | p.Leu819_Asp823del | 21.8%      | No                  |
| 25   | SNP  | 10q23.31 | STAMBPL1 STAM Binding Protein Like 1                   | CS          | NS-SNV     | p.Val334Ala        | 21.2%      | No                  |
| 26   | SNP  | 16p12.2  | OTOA Otoancorin                                        | CS          | NS-SNV     | p.Leu309Met        | 21.1%      | No                  |
| 27   | SNP  | 16p13.3  | TPSD1 Trypsin Delta 1                                  | EISR        |            |                    | 21.1%      | No                  |
| 28   | SNP  | 19p13.2  | MUC16 Mucin 16, Cell Surface Associated                | CS          | NS-SNV     | p.Pro7627His       | 20.7%      | No                  |
| 29   | SNP  | 1p13.3   | ATXN7L2 Ataxin 7 Like 2                                | CS          | NS-SNV     | p.Val18Leu         | 19.1%      | No                  |
| 30   | SNP  | 1q21.1   | NBPF10 NBPF Member 10                                  | CS          | NS-SNV     | p.Ser319Ala        | 18.8%      | No                  |
| 31   | SNP  | 4q31.3   | TMEM131L Transmembrane 131 Like                        | CS          | NS-SNV     | p.Asp1192Asn       | 18.2%      | No                  |
| 32   | SNP  | 20p11.21 | CST9 Cystatin 9                                        | CS          | Stoploss   |                    | 16.9%      | No                  |
| 33   | SNP  | Xp11.22  | DGKK Diacylglycerol Kinase Kappa                       | CS          | NS-SNV     | p.Gly1125Ala       | 15.6%      | No                  |
| 34   | SNP  | 2q12.3   | RGPD4 RANBP2-Like And GRIP Domain Containing 4         | CS          | NS-SNV     | p.Glu1628Gln       | 15.4%      | No                  |
| 35   | SNP  | 19p13.3  | ATP8B3 ATPase Phospholipid Transporting 8B3            | CS          | NS-SNV     | p.Met314Leu        | 14.8%      | No                  |
| 36   | SNP  | 7q11.23  | CLDN4 Claudin 4                                        | CS          | startloss  |                    | 12.4%      | No                  |
| 37   | SNP  | Xp21.3   | MAGEB10 MAGE Family Member B10                         | CS          | NS-SNV     | p.Asp112Glu        | 12.1%      | No                  |
| 38   | INS  | 4q31.3   | PRSS48 Protease, Serine 48                             | CS          | Frameshift | p.Gln42fs          | 11.9%      | No                  |
| 39   | SNP  | 6p24.2   | ELOVL2 ELOVL Fatty Acid Elongase 2                     | CS          | Stopgain   | p.Ser239*          | 11.3%      | No                  |
| 40   | SNP  | 10q22.1  | PRF1 Perforin 1                                        | CS          | NS-SNV     | p.Gly426Asp        | 9.5%       | No                  |
| 41   | SNP  | 3q26.2   | TNIK TRAF2 And NCK Interacting Kinase                  | CS          | NS-SNV     | p.Arg912His        | 9.5%       | No                  |
| 42   | SNP  | 12p13.2  | YBX3 Y-Box Binding Protein 3                           | CS          | NS-SNV     | p.Asn257Lys        | 7.8%       | No                  |
| 43   | SNP  | 16p11.2  | SULT1A1 Sulfotransferase Family 1A Member 1            | EISR        |            |                    | 5.9%       | No                  |

CS: Coding sequence, DR: Drug resistant, EISR: Extended intronic splice region, NS-SNV: Non-synonymous single
